# Supplementary material
Source: PubMed Central journal article supplement (PMC7054683)

Full blot images for Figure 1A:

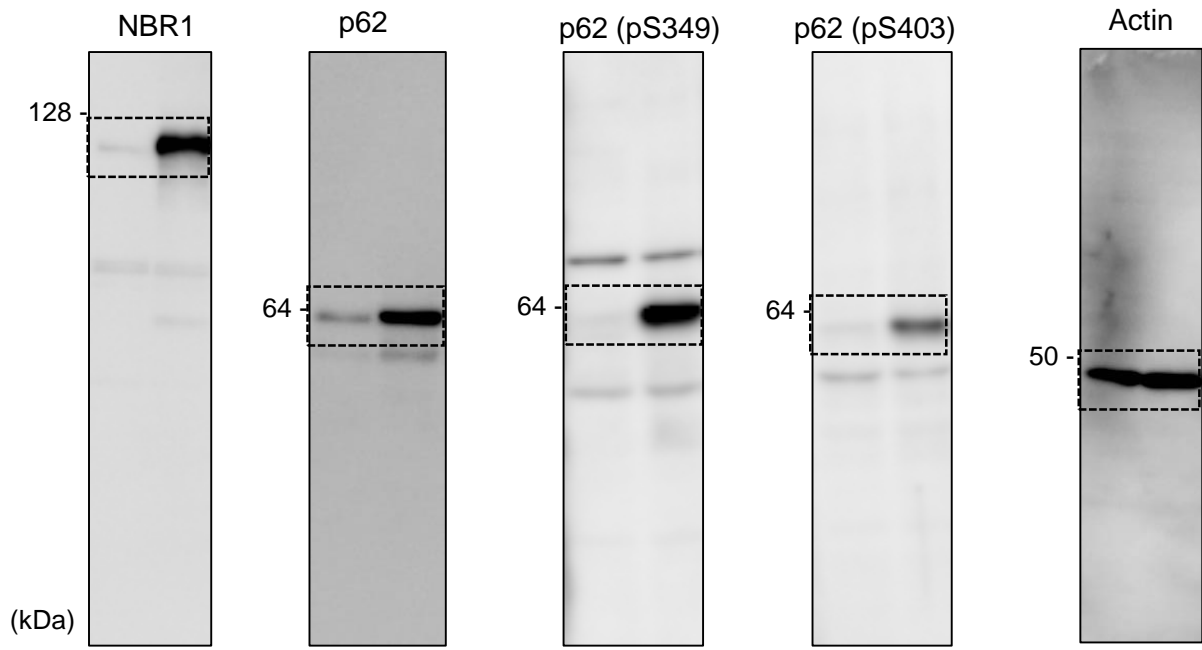

Figure 1

Supplement: EMBR-21-e48902-s003.pdf [file EMBR-21-e48902-s003.pdf]

Full blot images for Figure 3B:

Bound:

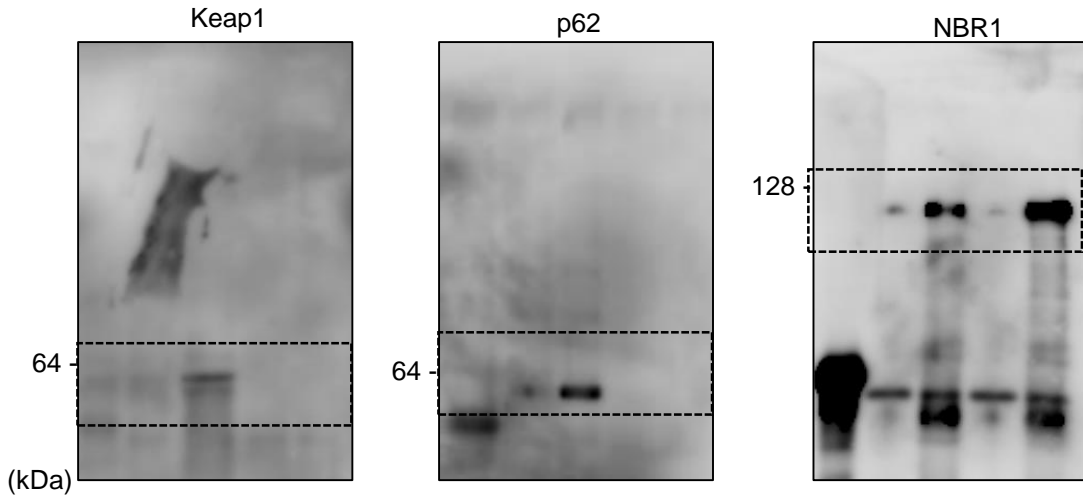

Crude Extracts:

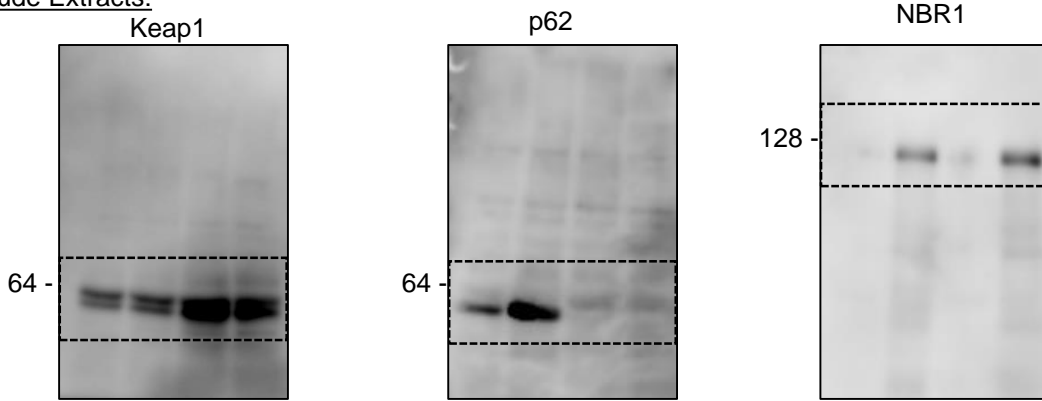

Full blot images for Figure 3C:

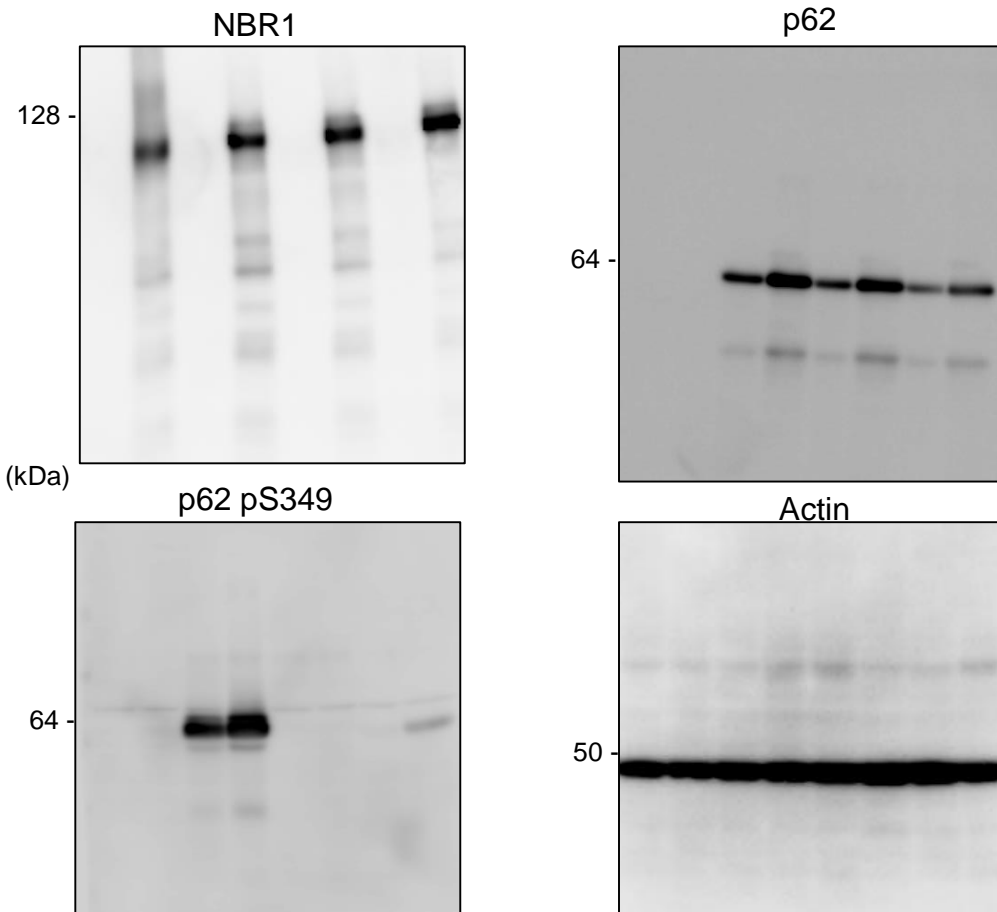

Figure 3

Supplement: EMBR-21-e48902-s005.pdf [file EMBR-21-e48902-s005.pdf]

Full blot images for Figure 6A:

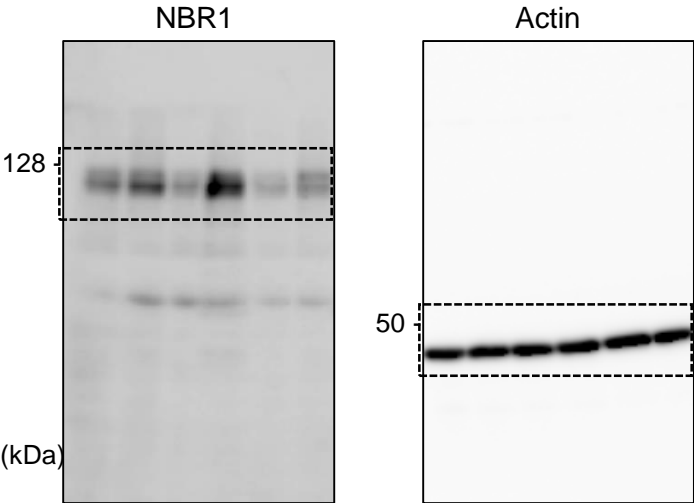

Figure 6

Supplement: EMBR-21-e48902-s008.pdf [file EMBR-21-e48902-s008.pdf]

Full blot images for Figure 7A:

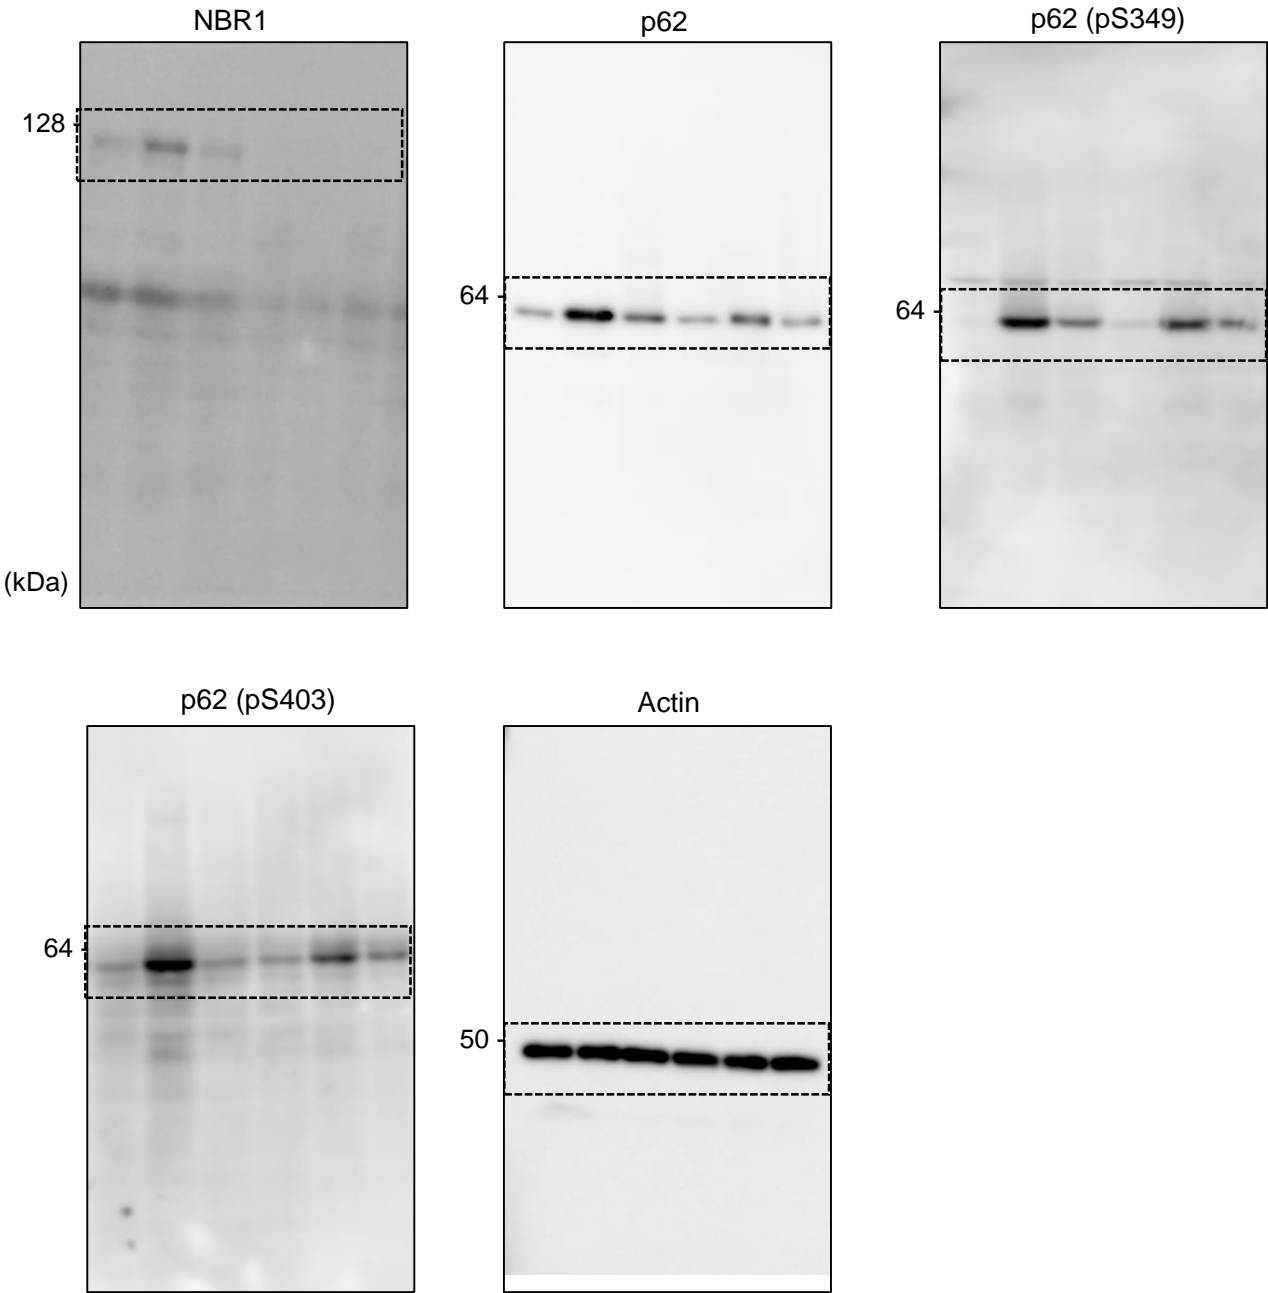

Figure 7

Supplement: EMBR-21-e48902-s009.pdf [file EMBR-21-e48902-s009.pdf]
